# Supplementary material for: 3D chemical imaging of the brain using quantitative IR spectro-microscopy
Source: Royal Society of Chemistry journal article supplement (doi:10.1039/c7sc03306k), 2017-10-17
Supplement: c7sc03306k2.pdf [file c7sc03306k2.pdf]

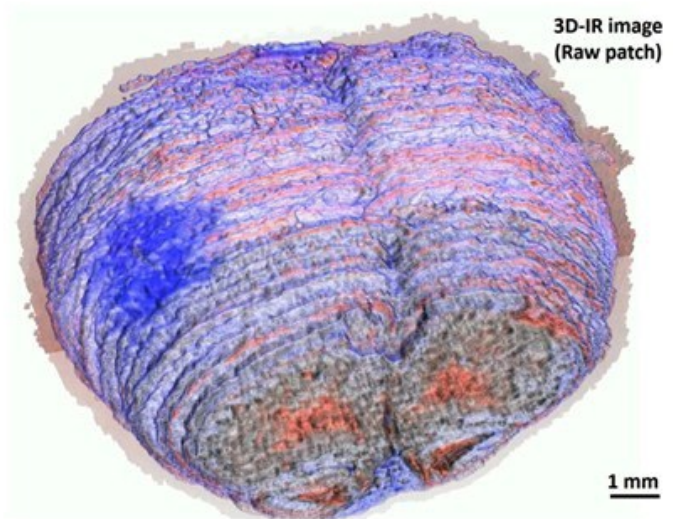

Supplementary material 13

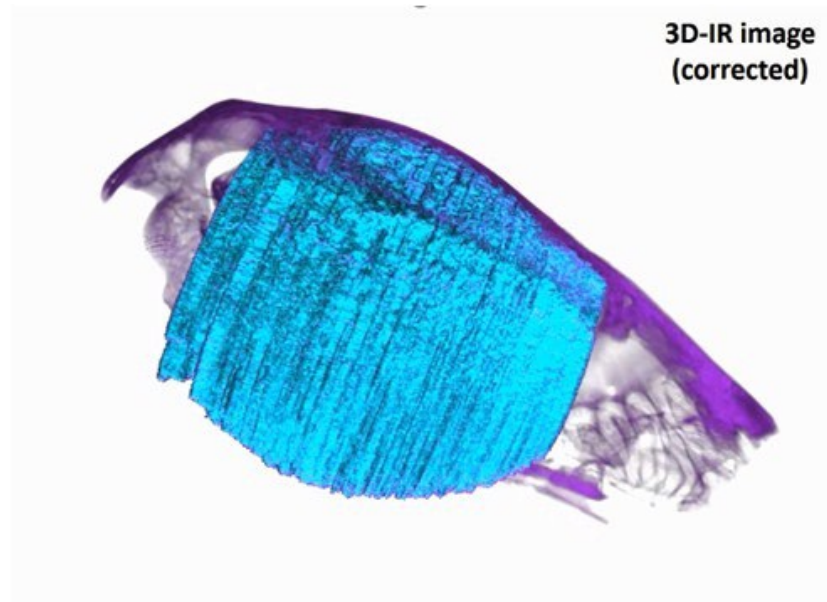

Supplementary material 14
